1  
2  
3  
4  
5  
6  
7  
8  
9  
10  
11  
12  
13  
14  
15  
16  
17  
18  
19  
20  
21  
22  
23  
24  
25

Psychosocial stress and central adiposity: A Brazilian study with users of the  
public health system

Flávia Vitorino Freitas<sup>1,2\*</sup>, Wagner Miranda Barbosa<sup>2</sup>, Laíz Aparecida Azevedo  
Silva<sup>3</sup>, Marianna Junger de Oliveira Garozi<sup>2</sup>, Júlia de Assis Pinheiro<sup>1</sup>, Aline  
Ribeiro Borçoi<sup>1</sup>, Catarine Lima Conti<sup>1</sup>, Juliana Krüger Arpini<sup>4</sup>, Heberth de  
Paula<sup>2</sup>, Mayara Mota de Oliveira<sup>1</sup>, Anderson Barros Archanjo<sup>1</sup>, Érika Aparecida  
Silva de Freitas<sup>1</sup>, Daniela Rodrigues de Oliveira<sup>5</sup>, Elizeu Batista Borloti<sup>6</sup>, Iuri  
Drumond Louro<sup>1</sup>, Adriana Madeira Alvares-da-Silva<sup>1,4</sup>

<sup>1</sup> Program of Post-Graduation in Biotechnology/Renorbio, Federal University of  
Espírito Santo, Alegre, ES, Brazil.

<sup>2</sup> Department of Pharmacy and Nutrition, Federal University of Espírito Santo,  
Alegre, ES, Brazil.

<sup>3</sup> Federal University of Rio de Janeiro, Macae, RJ, Brazil.

<sup>4</sup> Department of Biology, Federal University of Espírito Santo, Alegre, ES,  
Brazil.

<sup>5</sup> Program of Post-Graduation in Pathology, Federal University of Sao Paulo,  
Sao Paulo, SP, Brazil.

<sup>6</sup> Program of Post-Graduation in Psychology, Federal University of Espírito  
Santo, Vitoria, ES, Brazil.

26

27 \*E-mail: flavitorino@gmail.com (FVF)

28

## 29 **Abstract**

30 **Objective:** To assess the association between indicators of psychosocial stress  
31 and central adiposity in adult users of the Unified Health System (SUS) from  
32 Southeast of Brazil.

33 **Methods:** This cross-sectional study was conducted with 384 adults (20 to 59  
34 years old) from the city of Alegre, Southeastern Brazil. The simple random  
35 sample represented the population using the public health system of the  
36 municipality. The prevalence of obesity was based on the Body Mass Index,  
37 and central adiposity (dependent variable) was measured by waist  
38 circumference in centimeters. The independent variables were the following  
39 indicators of psychosocial stress: food and nutrition insecurity (yes/no), serum  
40 cortisol ( $\mu\text{g/dL}$ ), symptoms suggestive of depression using the Beck Depression  
41 Inventory-II  $\geq 17$  (yes/no), and altered blood pressure  $\geq 130/85$  mmHg (yes/no).  
42 Univariate linear regression was performed between central adiposity and each  
43 stress indicator, and later the models were adjusted for socioeconomic, health,  
44 and lifestyle variables. All analyses were stratified by rural and urban location.  
45 **Results:** The prevalence of weight excess was 68.3%, and 71.5% of individuals  
46 presented an increased risk for metabolic complications related to central  
47 adiposity. Mean waist circumference scores for the rural and urban population  
48 were  $89.3 \pm 12.7$  cm and  $92.9 \pm 14.7$  cm, respectively ( $p = 0.012$ ). Indicators of  
49 stress that were associated with central adiposity were: cortisol in the rural

50 population and altered blood pressure in the urban population. This occurred  
51 both in the raw analysis and in the models adjusted for confounding factors.  
52 **Conclusion:** The associations between stress and adiposity were different  
53 between rural (cortisol - inverse association) and urban (altered blood pressure)  
54 lifestyles, confirming the influence of local and psychosocial subsistence on the  
55 modulation of stress and on how individuals react or restrain stressors. Stress  
56 reduction strategies can be useful in public health programs designed to  
57 prevent or treat obesity.

58

59 **Keywords:** psychosocial stress, central adiposity, obesity, cortisol.

60

61

## 62 **Introduction**

63 Overweight and obesity are defined as abnormal or excessive  
64 accumulation of fat that can be detrimental to health.(1) Weight excess affects  
65 all regions of the world and is now appearing as a global epidemic. According to  
66 the World Health Organization (WHO), 38.9% of the world population aged 18  
67 or more present weight excess and of these, 13.1% are obese.(2) Compared to  
68 other WHO regions, the prevalence of weight excess is higher in the Americas  
69 (62% for overweight in both sexes, and 26% for obesity in adults over 20 years  
70 of age).(3) The prevalence is higher in the United States of America, Mexico,  
71 and Chile, where weight excess affects between six and seven out of 10  
72 adults.(3, 4) In Brazil, the National Health Survey (NHS) presented a similar  
73 scenario, with 56.9% of overweight adults.(5)

74           The term stress has already been mentioned in the literature over the  
75 years and designates all the non-specific effects of stressors or factors that may  
76 act on the body.(6, 7) Stress can be established in the individual in an acute or  
77 chronic way, manifested through changes in serum cortisol. Chronic stress can  
78 lead to changes in the Hypothalamic-Pituitary-Adrenal (HPA) axis, resulting in  
79 altered serum cortisol levels.(8, 9) The frequency of exposure to various  
80 stressors can trigger a general adaptation syndrome, composed of three  
81 phases: alarm reaction, adaptation phase, and exhaustion phase.(6, 10, 11)  
82 The manner in which an individual responds to environmental, economic, social,  
83 and health adversities is particularly differentiated, and when the possibilities for  
84 adaptation are overcome, psychosocial stress becomes a threat to well-  
85 being.(8, 10, 12)

86           With cultural changes, globalization, and consequent acceleration of the  
87 pace of life, there has been an increase in diseases resulting in psychosocial  
88 stress and chronic diseases such as obesity, leading concern to public health  
89 authorities.(1, 13-19) The relationship between obesity and psychosocial  
90 disorders is already well established.(8, 11, 12, 20-22) However, the way  
91 different cultures react to the environment and the cause and effect relationship  
92 between obesity and stress may be different; these facts along with the issues  
93 involved, create a complex concern for authorities. Therefore, this study aimed  
94 to evaluate the association between indicators of psychosocial stress and  
95 central adiposity in adult users of the Unified Health System (SUS) in a city in  
96 the Southeast of Brazil.

97

## 98 **Materials and Methods**

## 99 **Study design, sampling, and data collection**

100 This was a cross-sectional study with adults (20 to 59 years, SUS users),  
101 which was conducted in Alegre, a city located in the Southeast region of Brazil.  
102 It is a municipality with the largest population in the micro-region south of the  
103 State of Espirito Santo, Brazil, which has a Human Development Index similar  
104 to that of the country (HDI = 0.721 and 0.727, respectively), according to the  
105 United Nations Development Program (UNDP).(23)

106 A population of 10222 individuals, registered in the Primary Care  
107 Network of Municipal Health was considered in the study design. For the  
108 calculation of the simple random sample, absolute accuracy of 5%, 95%  
109 confidence interval, design effect equal to 1 and, in the absence of specific  
110 studies in the region, it was estimated that the prevalence of overweight  
111 individuals was around 50%. Finally, 10% of losses were added and the sample  
112 size calculated was 409 individuals.(24)

113 The study was approved by the Ethics Committee on Human Research,  
114 the Health Sciences Center, Federal University of Espirito Santo, under number  
115 1,574,160 issued on June 03, 2016. The inclusion criteria for participation in the  
116 study were the following: not being pregnant, having no cognitive conditions that  
117 would interfere with the response to the questionnaires, and declare free  
118 consent for participation.

119 Data collection was performed through an individual interview, with  
120 questionnaires that evaluated socioeconomic, health and lifestyle conditions,  
121 and food and nutrition insecurity (FNiS), as well as symptoms suggestive of  
122 depression. Anthropometric, blood pressure, and blood samples were also  
123 collected for cortisol analysis.

124           The socioeconomic, health, and lifestyle questionnaires were elaborated  
125 based on the Individual and Domiciliary Registry Files of SUS, Ministry of  
126 Health, Brazil. FNiS was evaluated by the application of the Brazilian Food  
127 Insecurity Scale (BFIS)(25, 26), a validated instrument comprising 14 questions,  
128 aimed at families from the same household with and without members under 18  
129 years of age; concerns evaluated were: lack of food at home, and having some  
130 member of the family spending a whole day without eating in the last three  
131 months, among others. The degree of severity of FNiS (mild, moderate, and  
132 severe) was grouped in this study.

133           Symptoms suggestive of depression were investigated using the Beck  
134 Depression Inventory-II (BDI-II), and total scores were categorized according to  
135 the literature: normal, mild, moderate, and severe.(27-29) For the purpose of  
136 this study, the following regrouping was used: normal or mild mood disorder  
137 (BDI-II <17), and symptoms suggestive of depression (BDI-II ≥ 17).

138           The anthropometric evaluation was performed by qualified professionals  
139 in the morning, after participants had fasted for a minimum of eight hours,  
140 following the technical standards of the Food and Nutritional Surveillance  
141 System (SISVAN).(30) Stature was evaluated using Altorexata® stadiometer,  
142 with a maximum capacity of 2.10 m and accuracy of 0.5 cm. The weight was  
143 measured on a Tanita® bipolar bioimpedance balance, with a BC601® branded  
144 body fat monitor (with 100 g division and maximum capacity of 150 kg). The  
145 Body Mass Index (BMI) was calculated and classified according to WHO  
146 reference for adults(1), in which low weight individuals present BMI values <  
147 18.5 kg/m<sup>2</sup>, eutrophic range from 18.5 to 24.9 kg/m<sup>2</sup>, overweight from 25.0 to  
148 29.9 kg/m<sup>2</sup>, and obese individuals BMI being ≥ 30.0 kg/m<sup>2</sup>. Waist circumference

149 (WC) was measured using an inextensible anthropometric tape TBW® (1.5 m  
150 and 0.1 cm accuracy), with reference to the midpoint between the last rib and  
151 the iliac crest. (31, 32) This study considered that increased risk of metabolic  
152 complications for men was associated with abdominal obesity with WC values  $\geq$   
153 94 cm; and very high risk with WC  $\geq$  102. For women, an increased risk of  
154 metabolic complications was considered at/with WC values  $\geq$  80 cm, and very  
155 high risk, with WC values  $\geq$  88 cm.(1, 32)

156 Blood pressure was measured using an aneroid sphygmomanometer  
157 with a G-TECH® Premium model. Both the measurement technique and the  
158 blood pressure classification were based on the VI Brazilian Guidelines for  
159 Hypertension from the Brazilian Society of Cardiology (SBC) for individuals 18  
160 years and older(33), considering altered blood pressure (AP) when values are  $\geq$   
161 130/85 mmHg.

162 Blood collection for cortisol analysis was performed in the morning,  
163 between 7:00 and 9:00 a.m. The samples were collected in a separator gel  
164 tube, kept at room temperature until the clot was retracted, then centrifuged at  
165 2500 rpm for 10 min and refrigerated at 2 ° C to 8 ° C until analysis. The  
166 concentration of cortisol was quantified by the chemiluminescence method and  
167 the reference values for the morning dose were 6.7 to 22.6  $\mu\text{g} / \text{dL}$ .(34)

168

## 169 **Data analysis**

170 Data were tabulated and submitted for consistency analysis. Individuals  
171 who presented inconsistency of anthropometric data and those who reported  
172 the use of corticosteroid medications were excluded from the analysis.

173 For the descriptive analysis, the variables were presented as medians  
174 and interquartile ranges, or means and standard deviations (non-parametric or  
175 parametric data, respectively, according to Kolmogorov-Smirnov normality test),  
176 besides frequencies and proportions. The Mann-Whitney U test or Student's t-  
177 test and the chi-square test were used to verify the differences related to the  
178 rural and urban locations, considering a level of significance of 5%. In the chi-  
179 square test, for the variables that had three or more categories and that  
180 presented significant differences, 2 x 2 ratio analysis was performed later, using  
181 the Bonferroni correction, which changes the level of significance ( $p$ ), to avoid  
182 type I errors derived from multiple comparisons. After this procedure, the  
183 corrected significance level was  $p < 0.016$ .(35)

184 Univariate linear regression models were used to evaluate the  
185 association between stress indicators and central adiposity. All statistical  
186 analyses were performed using SPSS® software, version 15.0 for Windows  
187 (IBM, Munich, Germany).

188 The univariate linear regression analysis consisted of simple models  
189 (crude analysis) hierarchically adjusted in three different models: Model 1,  
190 analysis adjusted by socioeconomic variables; Model 2, adjusted by  
191 socioeconomic and health variables; and Model 3, adjusted by socioeconomic,  
192 health, and lifestyle variables.

193

#### 194 **Outcome variable: Central adiposity**

195 In this study, the WC in centimeters was chosen as an outcome variable  
196 to predict central adiposity from the explanatory variables; it was included in the  
197 models as a continuous variable.



198

## 199 **Independent variables**

200 The independent variables selected for the univariate analyses were:  
201 FNiS (yes/no), serum cortisol ( $\mu\text{g/dL}$ ), symptoms suggestive of depression with  
202 BDI-II  $\geq 17$  (yes/no), and AP  $\geq 130/85$  mmHg (yes/no), which are directly or  
203 indirectly related to psychosocial stress. All these indicators were measured by  
204 methods and/or validated instruments with good reproducibility in previous  
205 studies.

206

## 207 **Potential confounding variables**

208 Socioeconomic variables (age, sex, schooling, and income  
209 classification), health (stress report, one or more comorbidities reported, and  
210 self-rated health), and lifestyle (current smoking, current alcohol consumption,  
211 and weekly physical or leisure activity) were chosen to adjust the univariate  
212 linear regression models based on the knowledge collected from the preexisting  
213 literature regarding the relation between psychosocial stress and overweight.(7,  
214 8, 12, 14, 36)

215 Among the socioeconomic variables, it is highlighted that schooling was  
216 evaluated in years of study and income was classified according to the Center  
217 for Social Policies of the Getúlio Vargas Foundation, which considers low-  
218 income individuals with a per capita income of less than US\$ 5 per day.(37) In  
219 the case of the variable comorbidities, the response options were diabetes,  
220 hypertension, cardiac palpitation, cardiovascular disease, and metabolic  
221 syndrome, conditions known to be associated with obesity and physical  
222 stress.(8) The practice of physical activity was added to leisure, and, as a

223 reference, it was considered that once a week was the minimum frequency to  
 224 "relief/escape" from the stressful routine, but not to be seen as the ideal.

225

226 **Modeling**

227 Beyond the WC (outcome variable), the variables age and serum cortisol  
 228 entered the models as continuous variables, and all others as categorical and  
 229 dichotomic, as shown in Table 1.

230

231 Table 1. Treatment of variables for modeling

| <b>Variables</b>                                 | <b>Dichotomization</b>              |
|--------------------------------------------------|-------------------------------------|
| <b>Dependent variable</b>                        |                                     |
| WC (cm)                                          | continuous variable                 |
| <b>Independent variables / Stress indicators</b> |                                     |
| FNiS                                             | yes* / no                           |
| Serum cortisol (µg/dL)                           | continuous variable                 |
| BDI-II ≥ 17                                      | yes* / no                           |
| AP ≥ 130/85 mmHg                                 | yes* / no                           |
| <b>Adjustment variables</b>                      |                                     |
| <b>Socioeconomic conditions</b>                  |                                     |
| Age                                              | continuous variable                 |
| Sex                                              | female* / male                      |
| Years of study                                   | < 9* / ≥ 9                          |
| Income classification (< \$5.00/day)             | low income* / non-low income        |
| <b>Health conditions</b>                         |                                     |
| Stress report                                    | yes* / no                           |
| 1 or + comorbidities reported                    | yes* / no                           |
| Self-rated health                                | regular or bad* / good or very good |
| <b>Lifestyle</b>                                 |                                     |

|                                                      |           |
|------------------------------------------------------|-----------|
| Current smoking                                      | yes* / no |
| Current alcohol consumption                          | yes* / no |
| Physical or leisure activities ( $\leq$ 1 time/week) | yes* / no |

232 \* indicates the reference category. WC: waist circumference; FNIS: Food and Nutritional Insecurity; BDI-II: Beck  
233 Depression Inventory-II; AP: Amended Pressure.

234

235 The univariate analyses for the rural and urban populations were  
236 performed separately, to evaluate the differences in the behavior of the  
237 predictor variables regarding the stratification of the models by location. All  
238 variables used in the models met the assumption of collinearity. The  
239 assumptions of normality, linearity, homoscedasticity, and independence of  
240 residues were met in all models that had  $p < 0.05$  in the F test. Results are  
241 presented as non-standard regression coefficients ( $\beta$ ), and their respective 95%  
242 confidence intervals (CI) and p-values related to the explanatory variable. All  
243 analyses were performed using the complete sample, and the significance level  
244 was 5% ( $p < 0.05$ ).

245

## 246 Results

247 A total of 384 individuals participated in the study, 75 men and 309  
248 women, corresponding to 19.5% and 80.5%, respectively. Among the  
249 participants, 133 were rural residents, and 251 lived in urban areas. The median  
250 age was 42.5 years (Interquartile Ranges - IR=18.0), and there was no  
251 significant difference between the urban and rural populations ( $p=0.82$ ) or  
252 between men and women ( $p=0.23$ ).

253 The prevalence of overweight was 33.1%, and that of obesity was 35.2%.

254 Regarding the risk of metabolic complications related to central adiposity (WC,

255 in cm), 51.6% of the sample presented increased risk and the risk of 19.9%  
 256 substantially increased. The median BMI and WC mean scores were higher in  
 257 the urban than in the rural populations. The other characteristics related to  
 258 health, socioeconomic conditions, and lifestyle of the population are presented  
 259 in Table 2.

260

261 Table 2. Characteristics of the population according to rural and urban locations

| Characteristics                             | All                 | Rural               | Urban               | p*           |
|---------------------------------------------|---------------------|---------------------|---------------------|--------------|
| <b>Health profile</b>                       |                     |                     |                     |              |
| <b>Nutritional Status - BMI</b>             |                     |                     |                     |              |
| Low weight                                  | 1.6 (6)             | 1.5 (2)             | 1.6 (4)             | 0.116**      |
| Eutrophy                                    | 30.2 (116)          | 33.1 (44)           | 28.7 (72)           |              |
| Overweight                                  | 33.1 (127)          | 36.8 (49)           | 31.1 (78)           |              |
| Obesity                                     | 35.2 (135)          | 28.6 (38)           | 38.6 (97)           |              |
| <b>BMI (kg/m<sup>2</sup>) – median (IR)</b> | <b>27.5 (7.8)</b>   | <b>26.8 (7.3)</b>   | <b>28.4 (8.1)</b>   | <b>0.027</b> |
| <b>Risk metabolic complications - WC</b>    |                     |                     |                     |              |
| Low                                         | 28.5 (109)          | 31.8 (42)           | 26.8 (67)           | 0.084**      |
| Increased                                   | 19.9 (76)           | 24.2 (32)           | 17.6 (44)           |              |
| Substantially increased                     | 51.6 (197)          | 43.9 (58)           | 55.6 (139)          |              |
| <b>WC (cm) - mean (±SD)</b>                 | <b>91.7 (±14.1)</b> | <b>89.3 (±12.7)</b> | <b>92.9 (±14.7)</b> | <b>0.012</b> |
| <b>Classification of cortisol - % (n)</b>   |                     |                     |                     |              |
| Low                                         | 10,0 (37)           | 15,0 (19)           | 7,4 (18)            | 0,042**      |
| Normal                                      | 87,8 (324)          | 81,9 (104)          | 90,9 (220)          |              |
| High                                        | 2,2 (8)             | 3,1 (4)             | 1,7 (4)             |              |
| <b>Serum cortisol (µg/dL) - median (IR)</b> | <b>12.1 (6.1)</b>   | <b>10.8 (5.5)</b>   | <b>12.9 (6.2)</b>   | <b>0.006</b> |
| <b>Depression - % (n)</b>                   |                     |                     |                     |              |
| BDI-II < 17                                 | 76.4 (272)          | 77.5 (93)           | 75.8 (179)          | 0.728        |
| BDI-II ≥ 17                                 | 23.6 (84)           | 22.5 (27)           | 24.2 (57)           |              |
| <b>AP ≥ 130/85 mmHg - % (n)</b>             |                     |                     |                     |              |
| No                                          | 79.8 (296)          | 87.5 (112)          | 75.7 (184)          | <b>0.007</b> |

|                                               |             |             |             |                  |
|-----------------------------------------------|-------------|-------------|-------------|------------------|
| Yes                                           | 20.2 (75)   | 12.5 (16)   | 24.3 (59)   |                  |
| <b>Stress report - % (n)</b>                  |             |             |             |                  |
| No                                            | 23.2 (89)   | 16.7 (22)   | 26.6 (67)   | <b>0.029</b>     |
| Yes                                           | 76.8 (295)  | 83.3 (110)  | 73.4 (185)  |                  |
| <b>Report of comorbidities - % (n)</b>        |             |             |             |                  |
| No report                                     | 65.7 (251)  | 70.2 (92)   | 63.3 (159)  | 0.179            |
| One or more comorbidity                       | 34.3 (131)  | 29.8 (39)   | 36.7 (92)   |                  |
| <b>Use of continuous medication - % (n)</b>   |             |             |             |                  |
| No                                            | 45.1 (173)  | 46.6 (62)   | 44.2 (111)  | 0.630            |
| Yes                                           | 54.9 (211)  | 53.4 (71)   | 55.8 (140)  |                  |
| <b>Self-rated health - % (n)</b>              |             |             |             |                  |
| Good or very good                             | 46.9 (180)  | 42.1 (56)   | 49.4 (124)  | 0.173            |
| Regular or poor                               | 53.1 (204)  | 57.9 (77)   | 50.6 (127)  |                  |
| <b>Socioeconomic profile</b>                  |             |             |             |                  |
| <b>BFIS Classification - % (n)</b>            |             |             |             |                  |
| FNS                                           | 58.2 (223)  | 60.6 (80)   | 57.0 (143)  | 0.493            |
| FNiS                                          | 41.8 (160)  | 39.4 (52)   | 43.0 (108)  |                  |
| <b>Age (years) - median (IR)</b>              | 42,5 (18,0) | 42,0 (18,0) | 43,0 (18,0) | 0,820            |
| <b>Skin color - % (n)</b>                     |             |             |             |                  |
| White                                         | 54.7 (205)  | 57.3 (75)   | 53.3 (130)  | 0.461            |
| Non-white                                     | 45.3 (170)  | 42.7 (56)   | 46.7 (114)  |                  |
| <b>Marital status - % (n)</b>                 |             |             |             |                  |
| Single                                        | 24.7 (95)   | 25.6 (34)   | 24.3 (61)   | 0.819            |
| Not single                                    | 75.3 (289)  | 74.4 (99)   | 75.7 (190)  |                  |
| <b>Years of study - % (n)</b>                 |             |             |             |                  |
| ≥ 9 years                                     | 54.0 (204)  | 40.9 (54)   | 61.0 (150)  | <b>&lt;0.001</b> |
| < 9 years                                     | 46.0 (174)  | 59.1 (78)   | 39.0 (96)   |                  |
| <b>Income classification - % (n)</b>          |             |             |             |                  |
| Non-low income (≥ \$5.00/ day)                | 58.5 (224)  | 45.1 (60)   | 65.6 (164)  | <b>&lt;0.001</b> |
| Low income (< \$5.00/ day)                    | 41.5 (159)  | 54.9 (73)   | 34.4 (86)   |                  |
| <b>Lifestyle</b>                              |             |             |             |                  |
| <b>Physical or leisure activities - % (n)</b> |             |             |             |                  |
| ≥ 1 time/ week                                | 86.1 (322)  | 84.9 (107)  | 86.7 (215)  | 0.640            |

|                                            |            |            |            |              |
|--------------------------------------------|------------|------------|------------|--------------|
| Non or ≤ 1 time/ week                      | 13.9 (52)  | 15.1 (19)  | 13.3 (33)  |              |
| <b>Current smoking - % (n)</b>             |            |            |            |              |
| No                                         | 91.9 (352) | 94.7 (125) | 90.4 (227) | 0.146        |
| Yes                                        | 8.1 (31)   | 5.3 (7)    | 9.6 (24)   |              |
| <b>Current alcohol consumption - % (n)</b> |            |            |            |              |
| No                                         | 68.9 (264) | 78.8 (104) | 63.7 (160) | <b>0.003</b> |
| Yes                                        | 31.1 (119) | 21.2 (28)  | 36.3 (91)  |              |

262 BMI: Body Mass Index; WC: Waist Circumference; AP: Amended Pressure; BFIS: Brazilian Food Insecurity Scale; FNS:  
 263 Food and Nutrition Security; FNiS: Food and Nutrition Insecurity; BDI-II: Beck Depression Inventory-II. Quantitative  
 264 variables presented in medians and interquartile ranges (IR), or means and standard deviations (±SD) according to  
 265 normality (Kolmogorov-Smirnov test); categorical variables presented in relative (%) and absolute (n) frequencies. \* p-  
 266 value for the tests: Mann-Whitney U or Student t and chi-square, at 5% significance and, when three or more  
 267 categories, corrected by Bonferroni. \*\* 5% significance, adjusted by Bonferroni (p <0.016).

268

269 Tables 3 and 4 present the results of the association between indicators  
 270 of psychosocial stress and central adiposity in the rural and urban populations,  
 271 respectively. In the rural population, serum cortisol was inversely associated  
 272 with central adiposity in all models. AP was associated with adiposity only in the  
 273 crude model, losing significance in the adjusted models (Table 3). The  
 274 evaluation done in the urban population showed that only AP was associated  
 275 with central adiposity and this occurred in all models (Table 4). The other stress  
 276 indicators evaluated – FNiS and BDI-II > 17 – had no association with central  
 277 adiposity in the study population (Tables 3 and 4).

278

279 Table 3. Association between indicators of stress and central adiposity in the  
 280 rural population

| Stress indicators | Univariate linear regression |       |   | Univariate linear regression models adjusted for confounding variables |       |   |         |       |   |         |       |   |
|-------------------|------------------------------|-------|---|------------------------------------------------------------------------|-------|---|---------|-------|---|---------|-------|---|
|                   | Gross analysis               |       |   | Model 1                                                                |       |   | Model 2 |       |   | Model 3 |       |   |
|                   | β                            | 95%CI | p | β                                                                      | 95%CI | p | β       | 95%CI | p | β       | 95%CI | p |

|                |       |        |              |       |        |              |       |        |              |       |         |              |
|----------------|-------|--------|--------------|-------|--------|--------------|-------|--------|--------------|-------|---------|--------------|
| FNiS           | -0.13 | -4.62; | 0.956        | -0.42 | -5.21; | 0.864        | -1.28 | -6.21; | 0.608        | -1.11 | -6.34;  | 0.675        |
|                |       | 4.37   |              |       | 4.38   |              |       | 3.65   |              |       | 4.12    |              |
| Serum cortisol | -0.61 | -1.06; | <b>0.010</b> | -0.51 | -0.98; | <b>0.033</b> | -0.58 | -1.05; | <b>0.015</b> | -0.60 | -1.09;  | <b>0.018</b> |
|                |       | -0.15  |              |       | -0.04  |              |       | -0.11  |              |       | -0.11   |              |
| BDI-II ≥ 17    | 4.62  | -0.71; | 0.089        | 5.16  | -0.06; | 0.053        | 4.31  | -1.45; | 0.141        | 4.95  | -1.57;  | 0.135        |
|                |       | 9.96   |              |       | 10.38  |              |       | 10.06  |              |       | 11.47   |              |
| AP             | 6.77  | 0.22;  | <b>0.043</b> | 2.68  | -4.35; | 0.452        | -1.72 | -9.80; | 0.674        | -4.71 | -13.64; | 0.298        |
|                |       | 13.33  |              |       | 9.71   |              |       | 6.36   |              |       | 4.22    |              |

281 Complex sample. Univariate linear regression. Significance level of 5% (p <0.05). Dependent variable: Waist  
 282 circumference (WC) in cm; Stress indicators (independent variables): Serum cortisol (in µg / dL); Food and Nutrition  
 283 Insecurity – FNiS (yes); Beck Depression Inventory-II – BDI-II ≥ 17 (yes); Amended Pressure – AP ≥ 130/85 mmHg  
 284 (yes). Gross analysis and univariate linear regression models hierarchically adjusted for confounding factors: *Model 1* -  
 285 gross analysis adjusted for socioeconomic variables (sex, age in years, schooling, and income status); *Model 2* – gross  
 286 analysis, adjusted for socioeconomic variables (sex, age in years, schooling, and income status), and health variables  
 287 (stress report, reporting one or more comorbidities, and self-rated health); *Model 3* – gross analysis, adjusted for  
 288 socioeconomic variables (sex, age, schooling, and income status), health variables (stress report, reporting of one or  
 289 more comorbidities, and self-rated health), and lifestyle variables (current smoker, current alcohol consumption, and  
 290 practice of physical activity and/or weekly leisure). β: beta coefficient; 95% CI: 95% confidence interval; p: p-value. The  
 291 variables used met the assumption of collinearity. The assumptions of normality, linearity, homoscedasticity, and  
 292 independence of residues were met in all models that had p <0.05 by F test.

293

294 Table 4. Association between indicators of stress and central adiposity in the  
 295 urban population

| Stress indicators | Univariate linear regression |        |                  | Univariate linear regression models adjusted for confounding variables |        |                  |                |        |              |                |        |              |
|-------------------|------------------------------|--------|------------------|------------------------------------------------------------------------|--------|------------------|----------------|--------|--------------|----------------|--------|--------------|
|                   | Gross analysis               |        |                  | <i>Model 1</i>                                                         |        |                  | <i>Model 2</i> |        |              | <i>Model 3</i> |        |              |
|                   | β                            | 95%CI  | p                | β                                                                      | 95%CI  | p                | β              | 95%CI  | p            | β              | 95%CI  | p            |
| FNiS              | -0.66                        | -4.37; | 0.725            | -0.62                                                                  | -4.59; | 0.758            | -1.22          | -5.31; | 0.558        | -0.65          | -4.81; | 0.759        |
|                   |                              | 3.04   |                  |                                                                        | 3.35   |                  |                | 2.87   |              |                | 3.51   |              |
| Serum cortisol    | -0.21                        | -0.62; | 0.294            | -0.17                                                                  | -0.59; | 0.409            | -0.19          | -0.61; | 0.359        | -0.27          | -0.69; | 0.211        |
|                   |                              | 0.19   |                  |                                                                        | 0.24   |                  |                | 0.22   |              |                | 0.15   |              |
| BDI-II ≥ 17       | 1.80                         | -2.66; | 0.427            | 1.59                                                                   | -3.08; | 0.503            | 0.82           | -4.02; | 0.740        | 1.64           | -3.27; | 0.512        |
|                   |                              | 6.25   |                  |                                                                        | 6.26   |                  |                | 5.65   |              |                | 6.55   |              |
| AP                | 9.66                         | 5.52;  | <b>&lt;0.001</b> | 8.41                                                                   | -4.05; | <b>&lt;0.001</b> | 7.07           | 2.59;  | <b>0.002</b> | 6.66           | 2.14;  | <b>0.004</b> |
|                   |                              | 13.80  |                  |                                                                        | 12.76  |                  |                | 11.55  |              |                | 11.18  |              |

296 Complex sample. Univariate linear regression. Significance level of 5% ( $p < 0.05$ ). Dependent variable: Waist  
297 circumference (WC) in cm; Stress indicators (independent variables): Serum cortisol (in  $\mu\text{g} / \text{dL}$ ); Food and Nutrition  
298 Insecurity – FNiS (yes); Beck Depression Inventory-II – BDI-II  $\geq 17$  (yes); Amended Pressure – AP  $\geq 130/85$  mmHg  
299 (yes). Gross analysis and univariate linear regression models hierarchically adjusted for confounding factors: *Model 1* -  
300 gross analysis adjusted for socioeconomic variables (sex, age in years, schooling, and income status); *Model 2* – gross  
301 analysis, adjusted for socioeconomic variables (sex, age in years, schooling, and income status), and health variables  
302 (stress report, reporting one or more comorbidities, and self-rated health); *Model 3* – gross analysis, adjusted for  
303 socioeconomic variables (sex, age, schooling, and income status), health variables (stress report, reporting one or more  
304 comorbidities, and self-rated health), and lifestyle variables (current smoker, current alcohol consumption, and practice  
305 of physical activity and/or weekly leisure).  $\beta$ : beta coefficient; 95% CI: 95% confidence interval; p: p-value. The variables  
306 used met the assumption of collinearity. The assumptions of normality, linearity, homoscedasticity, and independence of  
307 residues were met in all models that had  $p < 0.05$  by F test.

308

## 309 Discussion

310 This study evaluated the association between indicators of psychosocial  
311 stress and central adiposity in adults of a city in Southeast Brazil, and users of  
312 the Unified Health System (SUS). The health conditions of the Brazilian  
313 population, as well as other nations, transcend the concept of absence of  
314 diseases resulting from innumerable social, economic, environmental, and  
315 cultural factors. The main health problems of people living in poverty include  
316 increased exposure to environmental risk factors, diseases (especially non-  
317 communicable diseases), poor nutritional status, difficult access to health  
318 services and medicines, as well as other economic, psychosocial, cultural, or  
319 health factors, which act as stressing agents, affecting well-being and social  
320 interaction.(38)

321 This study was performed on a population that frequently uses the public  
322 health system, which presented socioeconomic (mainly in the rural area) and  
323 health fragility, including self-perception reports (53.1% reported poor or regular  
324 health), which may represent an impairment of the individual and collective



325 state of well-being, expressing as continuous stress. This, in turn, tends to feed  
326 the same cycle of psychosocial instability and lack of health and well-being in a  
327 chronic way.

328 The prevalence of weight excess ( $BMI \geq 25.0 \text{ kg / m}^2$ ) found in the  
329 present study (68.3%) was equivalent to the current US data and surpassed the  
330 weight excess data of the world population (52.0%)(2), of the Brazilian adult  
331 population (56.9%)(5), the population of the state of Espirito Santo (52.4%)(39),  
332 and of its capital Vitoria (49.7%).(40)

333 Data from the Family Expense Research - POF 2008-2009(39) showed a  
334 lower prevalence of overweight and obesity in rural Brazil (38.8% and 8.8%,  
335 respectively), whereas in the present study the prevalence of overweight and  
336 obesity were high and statistically similar, both in rural and urban areas (Table  
337 2).

338 Added to this context, the results were worse when the WC assessment  
339 was expanded, with a prevalence of 71.5% at risk of metabolic complications  
340 associated with central adiposity, with 51.6% of the individuals at high risk. This  
341 proportion exceeded the national prevalence stated in the National Health  
342 Survey – NHS(5), which was 37.0%, using the same cut points.(1, 32)

343 Based on the literature, the main socioeconomic, health, and lifestyle  
344 indicators related to excess weight were considered in the present study (Table  
345 2)(5, 9, 14, 26, 39, 41), which have also been referred to in studies as  
346 psychosocial stressors.(7-9, 11, 42)

347 Socioeconomic variables such as schooling and income are indicators of  
348 poverty and, together with the FNiS indicator, may represent a direct relation of  
349 hunger, and scarcity, with deficiency and malnutrition states.(25, 43, 44) The

350 socioeconomic profile traced in this study pointed to a high prevalence of FNiS  
351 (41.8%) in the general population, characterized by low schooling and income,  
352 especially in the rural population (Table 2). The nutritional assessment pointed to  
353 30.2% having eutrophy, and only 1.6% having low weight, distancing the  
354 population from the limit of 5% that would characterize the presence of current  
355 malnutrition.(5) On the other hand, it is known that poverty indicators are also  
356 related to excess caloric intake(45) and, consequently, to adiposity. Under these  
357 conditions, adiposity may even mask situations of nutritional deficiencies, which  
358 is often the case in less developed regions with populations of low schooling and  
359 income.(13, 14, 45)

360 FNiS was one of the variables chosen to evaluate the association  
361 between psychosocial stress and adiposity, since this indicator represents  
362 scarcity and is related to fear of hunger, insecurity, fragility, and individual and  
363 familial instability, which could trigger the activation of the HPA axis, with  
364 chronic stress setting. However, FNiS had no association with central adiposity  
365 (Tables 3 and 4).

366 In the context of analysis of health variables, 15% of the individuals living  
367 in rural areas had low levels of serum cortisol. Although the prevalence of  
368 hypocortisolemia was statistically similar between rural and urban areas, the  
369 median serum cortisol was significantly lower in the rural population than in the  
370 urban population ( $p = 0.006$ ), according to Table 2. In addition, in evaluating the  
371 association of stress indicators with central adiposity, serum cortisol was  
372 inversely associated with central adiposity in the rural population in all univariate  
373 analyses (gross analysis and confounding-adjusted models, as in Table 3). In  
374 the urban population, serum cortisol was not associated with adiposity (Table

375 4). The association found in the rural population was contrary to what has  
376 been observed in some studies on the relationship between stress and obesity,  
377 which have justified the weight gain, due to the increase in intake of palatable  
378 and high caloric foods, as a compensatory mechanism resulting in  
379 hypercortisolemia of chronic HPA axis activation(7, 8, 20, 46); or weight gain  
380 due to the deregulation of satiety mechanisms, through alterations in the leptin  
381 system, and also resulting from high levels of cortisol.(7, 12)

382 On the other hand, the notion that chronic stress acts simply by the direct  
383 effect of elevated serum cortisol is becoming less likely relevant in describing  
384 how the target tissues respond to cortisol, rather than the levels of the hormone  
385 itself.(9) Stressors trigger an HPA axis response by regulating corticotrophin-  
386 releasing factor and cortisol feedback and, over time, chronic overexposure to  
387 stressors may result in a blunted stress response with decreased levels of  
388 cortisol and other associated neurobiological dysfunctions.(47-49) In the  
389 absence of supportive care, stressors experienced during life, especially in early  
390 life and developmentally sensitive periods, such as pregnancy, childhood, and  
391 adolescence, may leave impressions on the neural substrate of emotional and  
392 cognitive processes, which may result in a blunted response to cortisol and  
393 consequent resilience of the individual to psychosocial stressors.(49) Regarding  
394 obesity, hyperactivation of the HPA axis has been observed in obese  
395 individuals, but also in individuals with paradoxically normal or low plasma  
396 cortisol levels. In a study by research colleagues(50), obesity was associated  
397 with relative insensitivity to glucocorticoid feedback. The authors suggested that  
398 this condition is characterized by a decreased response of the mineralocorticoid  
399 receptor to circulating cortisol.

400           However, the associations between cortisol and obesity appear to be  
401 more complex than anticipated(51). Although it promotes changes in the  
402 compensatory mechanism of food intake(7, 8, 20, 46), in the leptin system and  
403 satiety control mechanism(7, 8), cortisol is clearly not the only peripheral trigger  
404 of adverse effects, which may explain the controversies in this area. It seems  
405 likely that the pattern in which cortisol is secreted in front of the stressors is as  
406 important as total cortisol secretion. Thus, there is relevance in exploring the  
407 social, psychological conditions, health, and lifestyle of a population to identify  
408 the main psychosocial stressors and how individuals react and resist to stress.

409           Another indicator of psychosocial stress used in the present study was  
410 depression using BDI-II scores  $\geq 17$ . It is known that early life stress is a risk  
411 factor for psychopathology in adulthood, to the extent that the HPA axis was  
412 described as deregulated in individuals who experienced early psychosocial  
413 stress as well as in those with a wide range of psychiatric disorders.(52) In  
414 studies done by colleagues(53) related to chronic stress, depression, and  
415 location of urban neighborhoods, the daily stress of living in neighborhoods  
416 where residential mobility and material deprivation prevailed was associated  
417 with depression. Another study showing the association between urban versus  
418 rural environments and depression in the Scottish population found a higher  
419 prevalence of psychotropic medication prescription for anxiety, depression, and  
420 psychosis in the urban population.(54)

421           In the present study, a prevalence of depression was found in 23.6% of  
422 the population assisted by SUS, with a statistical similarity between rural and  
423 urban areas (Table 2). This indicator was not associated with adiposity in any of  
424 the models, according to Tables 3 and 4.

425 In the urban population, the evaluation of health variables pointed to  
426 higher levels within the following indicators: median BMI and cortisol, mean WC,  
427 and prevalence of high blood pressure (24.3% of individuals with AP),  
428 corroborating data from the literature related to hypertension and obesity in  
429 urban areas.(55, 56) Lifestyle assessment also showed higher alcohol  
430 consumption in the urban population (Table 2). Finally, AP was the only  
431 indicator of stress associated with adiposity in the urban population.

432 It is known that among the main risk factors for elevated blood pressure  
433 in adults are obesity, high sodium intake, smoking, alcohol consumption,  
434 psychological factors, and certain personality traits such as stress and  
435 anxiety.(57-59) Most studies report obesity as a predictor of arterial  
436 hypertension(58-63); however, in this study, it was hypothesized that AP, as a  
437 psychosocial stress indicator, could predict the increase of WC, which occurred  
438 in all models tested (Table 4). It is recalled here that, in the rural population  
439 (Table 3), AP was also associated with central adiposity, but this association  
440 occurred only in the gross analysis since the adjusted models for confounding  
441 variables lost their significance.

442 Finally, as part of the initial hypothesis, significant differences were  
443 observed between home locations. Socioeconomic conditions were challenging  
444 in the rural area regarding income and schooling, despite the statistical  
445 similarity in the prevalence of FNiS between rural and urban areas. In addition,  
446 the report of stress as a personality trait was higher in the population living in  
447 the rural region which, on the other hand, presented the lowest median for  
448 serum cortisol. As mentioned before, the urban population exceeded the rural  
449 population regarding the prevalence of AP. Both the literature review data(53,

450 54, 64, 65) and the findings of this study reinforce the influence of  
451 socioeconomic and livelihood conditions on the different mechanisms of  
452 adaptation of the organism to stressors, and on the different forms of coping  
453 and developing resilience.

454

## 455 **Conclusions**

456 The stress indicators that were associated with central adiposity were  
457 serum cortisol (with an inverse association) in the rural environment and altered  
458 blood pressure in the urban area. The study considered several variables  
459 known to be associated with stress and weight gain and the models presented  
460 robustness in the explanation of the results found.

461 The observed differences in adiposity prediction regarding housing  
462 location reinforce the influence of the local and psychosocial environments on  
463 the modulation of stress and on how individuals react to or restrain stressors.  
464 Stress reduction strategies can be useful in public health programs designed to  
465 prevent or treat obesity.

466 The study suggests the need for a better evaluation of the use of cortisol  
467 as a marker, since both high and low cortisol may explain variations in health  
468 status. Both levels relate to different forms of coping or resilience to  
469 psychosocial stress. Additionally, owing to the possible bidirectionality of the  
470 association between stress and adiposity, new paths should be drawn in the  
471 context of a thorough investigation of the mechanisms that explain psychosocial  
472 stress, with hypocortisolemia as a biomarker and adiposity as a consequence of  
473 current lifestyle.

474

## 475 **Acknowledgments**

476 We would like to thank the volunteers of this study, the Community  
477 Health Agents, and the entire Primary Care team of the Municipality of Alegre,  
478 ES, Brazil.

479

## 480 **Disclosure of potential conflicts of interest**

481 No potential conflicts of interest were disclosed. The funders had no role  
482 in the study design, data collection, analysis, decision to publish, or preparation  
483 of the manuscript.

484

## 485 **Author Contributions**

486 Conceived and designed the experiments: AMAS FVF. Performed the  
487 experiments: FVF WMB LAAS MJOG JAP ARB CLC JKA HP MMO ABA EASF.  
488 Analyzed the data: FVF AMAS WMB EBB IDL DRO. Contributed  
489 reagents/materials/analysis tools: FVF WMB LAAS MJOG JAP ARB CLC JKA  
490 HP ABA DRO EBB IDL AMAS. Wrote the paper: FVF AMAS. Research Project  
491 Coordinator: AMAS.

492

## 493 **References**

- 494 1. World Health Organization - WHO. Obesity: Preventing and managing the global  
495 epidemic: Report of a WHO Consultation on obesity. Geneva: World Health Organization  
496 Technical Report Series, 2000.894 p.
- 497 2. World Health Organization - WHO. Global Health Observatory data repositior.  
498 Overweight and obesity. Available from:  
499 [http://www.who.int/gho/ncd/risk\\_factors/overweight\\_obesity/obesity\\_adults/en/](http://www.who.int/gho/ncd/risk_factors/overweight_obesity/obesity_adults/en/).
- 500 3. World Health Organization - WHO. Global status report on noncommunicable diseases  
501 2014. Geneva: World Health Organization Technical Report Series, 2014.
- 502 4. Pan American Health Organization - PAHO. Plan of Action for the Prevention of Obesity  
503 in Children and Adolescents. Washington, D.C.: PAHO, 2015.

- 504 5. Instituto Brasileiro de Geografia e Estatística - IBGE, Coordenação de Trabalho e  
505 Rendimento. Pesquisa nacional de saúde 2013: ciclos de vida – Brasil e grandes regiões. Rio de  
506 Janeiro: IBGE, 2015; 92p.
- 507 6. Selye H. Stress and the general adaptation syndrome. *Br Med J.* 1950;1:1384-92.
- 508 7. Sinha R, Jastreboff AM. Stress as a common risk factor for obesity and addiction. *Biol*  
509 *Psychiatry.* 2013;73(9): 827-35.
- 510 8. Gundersen C, Mahatmya D, Garasky S, Lohman B. Linking psychosocial stressors and  
511 childhood obesity. *Obes Rev.* 2011;12(5): e54-63.
- 512 9. Cohen S, Janicki-Deverts D, Doyle WJ, Miller GE, Frank E, Rabin BS, et al. Chronic stress,  
513 glucocorticoid receptor resistance, inflammation, and disease risk. *Proceedings of the National*  
514 *Academy of Sciences of the United States of America.* 2012;109(16): 5995-99.
- 515 10. Fonseca FCA, Coelho RZ, Nicolato R, Malloy-Diniz LF, Silva-Filho HC. The influence of  
516 emotional factors on the arterial hypertension. *J Bras Psiquiatr.* 2009;58(2): 128-34.
- 517 11. Isasi CR, Parrinello CM, Jung MM, Carnethon MR, Birnbaum-Weitzman O, Espinoza RA,  
518 et al. Psychosocial stress is associated with obesity and diet quality in Hispanic/Latino adults.  
519 *Ann Epidemiol.* 2015;25(2):84-9.
- 520 12. Torres SJ, Nowson CA. Relationship between stress, eating behavior, and obesity.  
521 *Nutrition.* 2007;23(11-12): 887-94.
- 522 13. Chopra M, Galbraith S, Darnton-Hill I. A global response to a global problem: the  
523 epidemic of overnutrition. Geneva: Bulletin of the World Health Organization, 2002.80(12):  
524 952-58.
- 525 14. Rtveldadze K, Marsh T, Webber L, Kilpi F, Levy D, Conde W, et al. Health and Economic  
526 Burden of Obesity in Brazil. *PLoS ONE.* 2013;8(7): e68785.  
527 <https://doi.org/10.1371/journal.pone.0068785>.
- 528 15. Monteiro CA, Mondini L, de Souza AL, Popkin BM. The nutrition transition in Brazil. *Eur*  
529 *J Clin Nutr.* 1995;49: 105-13.
- 530 16. Monteiro CA, D'A Benicio MH, Conde WL, Popkin BM. Shifting obesity trends in Brazil.  
531 *Eur J Clin Nutr.* 2000;54:342-46.
- 532 17. Brasil. Ministério da Saúde. Perspectivas e desafios no cuidado as pessoas com  
533 obesidade no SUS: resultados do laboratório de inovação no manejo da obesidade nas Redes  
534 de Atenção à Saúde/Ministério da Saúde; Organização Pan-Americana da Saúde. Brasília:  
535 Ministério da Saúde. 2014;116 p.
- 536 18. Carvalho MC, Martins AA. A obesidade como objeto complexo: uma abordagem  
537 filosófico-conceitual *Ciência & Saúde Coletiva.* 2004;9(4): 1003-12.
- 538 19. Chan M. Opening address at the 8th Global Conference on Health Promotion Helsinki,  
539 Finland 10 June 2013. Available from :  
540 [www.who.int/dg/speeches/2013/health\\_promotion\\_20130610/en/index.html](http://www.who.int/dg/speeches/2013/health_promotion_20130610/en/index.html).
- 541 20. Epel ES, McEwen B, Seeman, T. Stress and body shape: stress-induced cortisol  
542 secretion is consistently greater among women with central fat. *Psychosom Med.* 2000;62:  
543 623-32.
- 544 21. Ehlert U. Enduring psychobiological effects of childhood adversity.  
545 *Psychoneuroendocrinology.* 2013;38: 1850-57.
- 546 22. Associação Brasileira para o Estudo da Obesidade e da Síndrome Metabólica - ABESO.  
547 Diretrizes brasileiras de obesidade 2016. 4.ed. São Paulo, SP: ABESO. 2016; 188 p.
- 548 23. Instituto Brasileiro de Geografia e Estatística - IBGE. Panorama IBGE Cidades. Available  
549 from: <https://cidades.ibge.gov.br/brasil/es/alegre/panorama>.
- 550 24. Dean AG, Sullivan KM, Soe, MM. OpenEpi: Open Source Epidemiologic Statistics for  
551 Public Health, Versão. Available from: [www.OpenEpi.com](http://www.OpenEpi.com), updated: April 6, 2013.
- 552 25. Segall-Corrêa AM, Marin-Leon L. A Segurança Alimentar no Brasil: Proposição e Usos  
553 da Escala Brasileira de Medida da Insegurança Alimentar (EBIA) de 2003 a 2009. *Segurança*  
554 *Alimentar e Nutricional, Campinas.* 2009;16(2): 1-19.



- 555 26. Instituto Brasileiro de Geografia e Estatística - IBGE. Pesquisa Nacional por Amostra de  
556 Domicílios PNAD. Segurança Alimentar 2013. Rio de Janeiro: IBGE. 2014; 134 p.
- 557 27. Braver MJB, Green J, Rawson R. Childhood abuse and current psychological functioning  
558 in a university counseling center population. *J Couns Psychol.* 1992;39: 2-6.
- 559 28. Burns DD. *Feeling good: The new mood therapy.* New York: New American Library,  
560 1981.
- 561 29. Ibrahim MBA. Prevalence of anxiety and depression among medical and  
562 pharmaceutical students in Alexandria University. *Journal of Medicine.* 2014;51:7.
- 563 30. Brasil. Ministério da Saúde. Secretaria de Atenção à Saúde. Departamento de Atenção  
564 Básica. Orientações básicas para coleta, o processamento e análise de dados e a informação  
565 em serviço de saúde. Norma Técnica do Sistema de Vigilância Alimentar e Nutricional –  
566 SISVAN. Brasília, DF. 2011;76 p.
- 567 31. Lohman T, Roche A, Martorell R. *Anthropometric standardization reference manual.*  
568 Champagne, Illinois, Human Kinetic Books; 1988.
- 569 32. World Health Organization - WHO. *Waist circumference and waist-hip ratio: report of*  
570 *a WHO expert consultation.* Geneva, World Health Organization. 2011;47 p.
- 571 33. Sociedade Brasileira de Cardiologia - SBC. VI Diretrizes Brasileiras de Hipertensão. *Arq*  
572 *Bras Cardiol.* 2010;95(1 supl.1): 1-51.
- 573 34. Instituto de Patologia Clínica Hermes Pardini. *Manual de Exames.* Hermes Pardini:  
574 2015/2016. 573 p. Available from:  
575 [https://www3.hermespardini.com.br/repositorio/media/site/profissionais\\_da\\_saude/manual\\_](https://www3.hermespardini.com.br/repositorio/media/site/profissionais_da_saude/manual_exames.pdf)  
576 [exames.pdf.](https://www3.hermespardini.com.br/repositorio/media/site/profissionais_da_saude/manual_exames.pdf)
- 577 35. Andy Field. *Descobrimo a estatística usando o SPSS.* 2.ed. Porto Alegre: Artmed. 2009;  
578 684 p. ISBN: 978-85-363-2018-2.
- 579 36. Monteiro CA, Conde WL. A Tendência Secular da Obesidade Segundo Estratos Sociais:  
580 Nordeste e Sudeste do Brasil 1975-1989-1997. *Arq Bras Endocrinol Metab.* 1999;43(3): 186-94.
- 581 37. Neri MC. Fundação Getúlio Vargas – FGV. Centro de Políticas Sociais – CPS. *A nova*  
582 *classe média: desigualdade, renda, miséria, classe média, mobilidade trabalhista I.* Rio de  
583 Janeiro: FGV/IBRE, CPS, 2008; 70 p.
- 584 38. Instituto de Pesquisa Econômica Aplicada - IPEA. *Brasil em desenvolvimento 2013:*  
585 *estado, planejamento e políticas públicas.* Editores: Rogério Boueri, Marco Aurélio Costa.  
586 Brasília: Ipea, v. 3 (Brasil: o Estado de uma Nação), 2013
- 587 39. Instituto Brasileiro de Geografia e Estatística - IBGE. Ministério do Planejamento,  
588 Orçamento e Gestão. *Pesquisa de Orçamentos Familiares – POF 2008/2009. Antropometria e*  
589 *Estado Nutricional de Crianças, Adolescentes e Adultos no Brasil.* Rio de Janeiro: IBGE, 2010;  
590 130 p.
- 591 40. Brasil. Ministério da Saúde. Secretaria de Vigilância em Saúde. Departamento de  
592 Vigilância de Doenças e Agravos não Transmissíveis e Promoção da Saúde. *Vigitel Brasil 2016:*  
593 *estimativas sobre frequência e distribuição sociodemográfica de fatores de risco e proteção*  
594 *para doenças crônicas nas capitais dos 26 estados brasileiros e no Distrito Federal em 2016.*  
595 Brasília: Ministério da Saúde, 2017; 160p.
- 596 41. Rundle A, Richards C, Bader MD, Schwartz-Soicher O, Lee KK, Quinn J, et al. Individual-  
597 and school-level sociodemographic predictors of obesity among New York City public school  
598 children. *Am J Epidemiol.* 2012;176(11): 986-94.
- 599 42. Razzoli M, Bartolomucci A. The dichotomous effect of chronic stress on obesity. *TEM.*  
600 2016;27(7): 504-15.
- 601 43. Graziano da Silva J, Del Grossi ME, França CG. *O Programa Fome Zero: a experiência*  
602 *brasileira.* Brasília: MDA. (NEAD Série Especial, 13), 2010.
- 603 44. VALENTE FLS. *O direito humano à alimentação: desafios e conquistas. Do combate à*  
604 *fome à insegurança alimentar e nutricional: o direito à alimentação adequada.* São Paulo:  
605 Cortez Editora, 2002; p. 37- 70.

- 606 45. Moubarac JC, Batal M, Louzada ML, Martinez Steele E, Monteiro CA. Consumption of  
607 ultra-processed foods predicts diet quality in Canada. *Appetite*. 2017;108: 512-20.
- 608 46. Björntorp P, Rosmond R. Obesity and Cortisol. *Nutrition*, 2000; 16(10).
- 609 47. Gunnar M, Quevedo K. The neurobiology of stress and development. *Annu Rev*  
610 *Psychol*. 2007;58: 145-73.
- 611 48. Turner HA, Turner RJ. Understanding variations in exposure to social stress. *Health*.  
612 2005;9(2): 209-40.
- 613 49. Harkness KL, Stewart JG, Wynne-Edwards KE. Cortisol reactivity to social stress in  
614 adolescents: role of depression severity and child maltreatment. *Psychoneuroendocrinology*.  
615 2011;36(2): 173-81.
- 616 50. Jessop DS, Dallman MF, Fleming D, Lightman SL. Resistance to glucocorticoid feedback  
617 in obesity. *J Clin Endocrinol Metab*. 2001;86(9): 4109-14.
- 618 51. John K, Marino JS, Sanchez ER, Hinds TD, Jr. The glucocorticoid receptor: cause of or  
619 cure for obesity? *Am J Physiol Endocrinol Metab*. 2016;310(4): E249-57.
- 620 52. Palma-Gudiel H, Cordova-Palomera A, Leza JC, Fananas L. Glucocorticoid receptor gene  
621 (NR3C1) methylation processes as mediators of early adversity in stress-related disorders  
622 causality: A critical review. *Neurosci Biobehav Rev*. 2015;55: 520-35.
- 623 53. Matheson FI, Moinuddin R, Dunn JR, Creatore MI, Gozdyra P, Glazier RH. Urban  
624 neighborhoods, chronic stress, gender and depression. *Soc Sci Med*. 2006;63(10): 2604-16.
- 625 54. McKenzie K, Murray A, Booth T. Do urban environments increase the risk of anxiety,  
626 depression and psychosis? An epidemiological study. *J Affect Disord*. 2013;150(3): 1019-24.
- 627 55. Sobngwi E, Mbanya JC, Unwin NC, Kengne AP, Fezeu L, Minkoulou EM, et al. Physical  
628 activity and its relationship with obesity, hypertension and diabetes in urban and rural  
629 Cameroon. *International journal of obesity and related metabolic disorders. Journal of the*  
630 *International Association for the Study of Obesity*. 2002;26(7): 1009-16.
- 631 56. Vidya BR, Swetha S, Neerajaa J, Varsha MJ, Janani DM, Rekha SN, et al. An  
632 epidemiological survey: Effect of predisposing factors for PCOS in Indian urban and rural  
633 population. *Middle East Fertil Soc J*. 2017;22(4): 313-16.
- 634 57. Fonseca FCA, Coelho RZ, Nicolato R, Mally-Diniz LF, Silva Filho HC. A influência de  
635 fatores emocionais sobre a hipertensão arterial. *J Bras Psiquiatr*. 2009; 58(2): 128-34.
- 636 58. Bezerra VM, Andrade ACS, Medeiros DS, Caiaffa WT. [Arterial prehypertension in slave-  
637 descendant communities in southeast Bahia State, Brazil]. *Cadernos de Saude Publica*.  
638 2017;33(10): e00139516.
- 639 59. Bezerra VM, Andrade ACdS, César CC, Caiaffa WT. Comunidades quilombolas de Vitória  
640 da Conquista, Bahia, Brasil: hipertensão arterial e fatores associados. *Cadernos de Saude*  
641 *Publica*. 2013;29(9): 1889-902.
- 642 60. Schmidt MI, Duncan BB, e Silva GA, Menezes AM, Monteiro CA, Barreto SM, et al.  
643 Chronic non-communicable diseases in Brazil: burden and current challenges. *The Lancet*.  
644 2011;377(9781): 1949-61.
- 645 61. Davy KP, Hall JE. Obesity and hypertension: two epidemics or one? *Am J Physiol Regul*  
646 *Integr Comp Physiol*. 2004;286: R803-R813.
- 647 62. Hall JE, do Carmo JM, da Silva AA, Wang Z, Hall ME. Obesity-induced hypertension:  
648 interaction of neurohumoral and renal mechanisms. *Circulation Research*. 2015;116(6): 991-  
649 1006.
- 650 63. Jiang SZ, Lu W, Zong XF, Ruan HY, Liu Y. Obesity and hypertension. *Exp Ther Med*.  
651 2016;12(4): 2395-99.
- 652 64. Elgar FJ, Arlett C, Groves R. Stress, coping, and behavioural problems among rural and  
653 urban adolescents. *J Adolesc*. 2003;26(5): 574-85.
- 654 65. Sameem S, Sylwester K. The business cycle and mortality: urban versus rural counties.  
655 *Soc Sci Med*. 2017;175: 28-35.

656
